# Supplementary material
Source: MDPI journal article supplement (https://www.mdpi.com/2071-1050/11/11/3128)
Supplement: s1 [file s1]

### Mathematical Equations of the SD Model

Table S1 presents the variables of the proposed model, separated by modules, which identifies the type (stock, flow and auxiliary), as well as the mathematical equations related to the unit.

**Table 1.** Mathematical Equations of the SD model.

| Module                     | Type      | Variable                                      | Equation                                                                                           | Unit         | Number |
|----------------------------|-----------|-----------------------------------------------|----------------------------------------------------------------------------------------------------|--------------|--------|
| Load<br>Volume<br>Forecast | Stock     | Total freight volume                          | $(\text{Increase of total freight volume})dt + S(t_0)$                                             | ton          | 1      |
|                            | Stock     | Freight volume route #1                       | $(\text{Increase of freight volume route \#1})dt + S(t_0)$                                         | ton          | 2      |
|                            | Stock     | Freight volume route #2                       | $(\text{Increase of freight volume route \#2})dt + S(t_0)$                                         | ton          | 3      |
|                            | Flow      | Increase of total freight volume              | $\text{Total freight volume} \cdot \text{Growth rate of freight volume}/\text{SAVEPER}$            | ton/year     | 4      |
|                            | Flow      | Increase of freight volume route #1           | $\text{Freight volume in next year of route \#1} - \text{Freight volume route \#1}/\text{SAVEPER}$ | ton/year     | 5      |
|                            | Flow      | Increase of freight volume route #2           | $\text{Freight volume in next year of route \#2} - \text{Freight volume route \#2}/\text{SAVEPER}$ | ton/year     | 6      |
|                            | Auxiliary | Freight volume in next year of route #1       | $\text{Total freight volume} \cdot \text{split proportion of freight volume \#1}$                  | ton          | 7      |
|                            | Auxiliary | Freight volume in next year of route #2       | $\text{Total freight volume} \cdot \text{split proportion of freight volume \#2}$                  | ton          | 8      |
|                            | Auxiliary | Freight volume of #1                          | $\text{Freight volume route \#1}/\text{SAVEPER}$                                                   | ton/year     | 9      |
|                            | Auxiliary | Freight volume of #2                          | $\text{Freight volume route \#2}/\text{SAVEPER}$                                                   | ton/year     | 10     |
| Speed<br>Flow              | Auxiliary | Truck loadage #1                              | $\text{Truck loadage of statutory limit} \cdot (1 + \text{overweight percentage})$                 | ton/vehicle  | 11     |
|                            | Auxiliary | Truck loadage #2                              | $\text{Truck loadage of statutory limit}$                                                          | ton/vehicle  | 12     |
|                            | Flow      | Vehicle with ornamental stones #1             | $\text{Freight volume of \#1}/\text{Truck loadage \#1} \cdot (1 + \text{overweight percentage})$   | vehicle/year | 13     |
|                            | Flow      | Increase in heavy vehicle traffic #1          | $\text{Heavy vehicle traffic \#1} \cdot \text{AADT growth rate}/\text{SAVEPER}$                    | vehicle/year | 14     |
|                            | Stock     | Heavy vehicle traffic #1                      | $(\text{Increase in heavy vehicle traffic \#1})dt + S(t_0)$                                        | vehicle      | 15     |
|                            | Auxiliary | Accumulated heavy vehicle in the next year #1 | $\text{Heavy vehicle traffic \#1}$                                                                 | vehicle      | 16     |
|                            | Flow      | Heavy vehicle flow #1                         | $\text{Accum. heavy vehicle in next year \#1} - \text{Accum. heavy vehicle \#1}/\text{SAVEPER}$    | vehicle/year | 17     |
|                            | Stock     | Accumulated heavy vehicle #1                  | $(\text{Heavy vehicle flow \#1})dt + S(t_0)$                                                       | vehicle      | 18     |
|                            | Flow      | Heavy vehicle #1                              | $(\text{Accum heavy vehicle}/\text{SAVEPER}) - (\text{freight volume}/\text{truck loadage})$       | vehicle/year | 19     |

Table 1. Equations of the SD model (continue).

|                      |           |                                                         |                                                                                                                                                                 |                          |    |
|----------------------|-----------|---------------------------------------------------------|-----------------------------------------------------------------------------------------------------------------------------------------------------------------|--------------------------|----|
|                      | Stock     | Total traffic #1                                        | $(Vehicle\ with\ ornamental\ stones\ \#1 + heavy\ vehicles\ \#1 + light\ vehicles\ \#1 - total\ vehicles\ \#1) + S(t_0)$                                        | vehicle                  | 20 |
|                      | Flow      | Total vehicles #1                                       | $Total\ traffic\ \#1 / SAVEPER$                                                                                                                                 | vehicle/year             | 21 |
|                      | Auxiliary | $V_{vhp}$                                               | $Total\ vehicles\ \#1 / Hours\ per\ year . peak\ hour\ factor$                                                                                                  | vehicle/hour             | 22 |
|                      | Auxiliary | Percentage of heavy vehicle #1 ( $P_{HV}$ )             | $(heavy\ vehicle\ \#1 + vehicle\ with\ ornamental\ stones\ \#1) / total\ vehicles\ \#1$                                                                         | vehicle/vehicle          | 23 |
|                      | Auxiliary | Heavy vehicle adjustment factor ( $f_{HV}$ ) for volume | $1 / (1 + P_{HV}) . (Equivalent\ of\ heavy\ vehicle\ volume\ adjustment - 1)$                                                                                   | vehicle/pce              | 24 |
|                      | Auxiliary | Traffic equivalent volume #1                            | $V_{vhp} / (grade\ adjustment\ (f_g)\ for\ volume . f_{HV}\ for\ volume)$                                                                                       | pce/hour                 | 25 |
|                      | Auxiliary | $f_{HV}$ for capacity                                   | $1 / (1 + P_{HV}) . (Equivalent\ of\ heavy\ vehicles\ capacity\ adjustment - 1)$                                                                                | dimensionless            | 26 |
|                      | Auxiliary | Average capacity #1                                     | $maximum\ capacity . fg\ for\ capacity . f_{HV}\ for\ capacity$                                                                                                 | pce/hour                 | 27 |
|                      | Auxiliary | Volume/Capacity ( $v/c$ )                               | $traffic\ equivalent\ volume\ \#1 / average\ capacity\ \#1$                                                                                                     | dimensionless            | 28 |
|                      | Auxiliary | Average travel time #1                                  | $Free\ flow\ time\ \#1 . (1 + \alpha . (v/c\ \#1)^\beta)$                                                                                                       | hour/vehicle             | 29 |
|                      | Auxiliary | Free flow time #1                                       | $distance\ \#1 / free\ flow\ speed\ \#1$                                                                                                                        | hour/vehicle             | 30 |
|                      | Auxiliary | Total travel time route #i                              | $(Average\ travel\ time\ \#i1 + Average\ travel\ time\ \#i2)$                                                                                                   | hour/vehicle             | 31 |
| Modal Split          | Auxiliary | Route distance #i                                       | $Distance\ \#i1 + Distance\ \#i2$                                                                                                                               | km                       | 32 |
|                      | Auxiliary | Split proportion of freight volume #1                   | $exp^{(-generalized\ cost\ of\ route\ \#1)} / \sum_{i=1}^2 exp^{(-generalized\ cost\ of\ route\ \#i)}$                                                          | dimensionless            | 33 |
|                      | Auxiliary | Split proportion of freight volume #2                   | $1 - Split\ proportion\ of\ freight\ volume\ \#1$                                                                                                               | dimensionless            | 34 |
|                      | Auxiliary | Generalized cost                                        | $((operational\ cost\ per\ distance . distance\ route) + (operational\ cost\ per\ time . total\ travel\ time) + toll\ of\ unit\ freight\ volume + fine\ costs)$ | R\$/ton                  | 35 |
|                      | Auxiliary | Operational cost per distance                           | $(distance\ cost\ \#1 / truck\ loadage\ \#1) . cost\ growth\ rate$                                                                                              | R\$/Km/ton               | 36 |
|                      | Auxiliary | Operational cost per time                               | $time\ cost\ \#1 / truck\ loadage\ \#1 . cost\ growth\ rate$                                                                                                    | (R\$/hour)/(ton/vehicle) | 37 |
|                      | Auxiliary | Toll of unit freight volume #1                          | $Toll\ \#1 / truck\ loadage\ \#1$                                                                                                                               | R\$/ton                  | 38 |
|                      | Auxiliary | Cost growth rate                                        | $(1 + inflation\ rate)^{(Time - Initial\ Time) / SAVEPER}$                                                                                                      | dimensionless            | 39 |
|                      | Auxiliary | Design ESAL #1                                          | $fleet\ vehicle\ factor . total\ volume\ of\ vehicles\ \#1$                                                                                                     | times                    | 40 |
|                      | Auxiliary | Total volume of vehicles #1                             | $average\ volume\ of\ vehicles\ \#1 . (days/year) . service\ life\ of\ project$                                                                                 | vehicle                  | 41 |
| Pavement Maintenance | Auxiliary | Average volume of vehicles #1                           | $AADT\ initial\ year\ \#1 . ((2 + service\ life\ of\ project . AADT\ growth\ rate) / 2)$                                                                        | vehicle/day              | 42 |
|                      | Auxiliary | Current life spam #1                                    | $IF\ THEN\ ELSE(x > service\ life\ of\ project, service\ life\ of\ project, x)$                                                                                 | year                     | 43 |
|                      | Auxiliary | x                                                       | $Design\ ESAL\ \#1 / Current\ ESAL\ \#1$                                                                                                                        | year                     | 44 |

**Table 1.** Equations of the SD model (continue).

|              |           |                                         |                                                                                                                                                                         |               |    |
|--------------|-----------|-----------------------------------------|-------------------------------------------------------------------------------------------------------------------------------------------------------------------------|---------------|----|
|              | Auxiliary | Current ESAL #1                         | $(TF \text{ light truck} + TF \text{ bus} + TF \text{ single trailer} + TF \text{ multi trailer}) \cdot \text{total vehicles \#1} \cdot \text{regional climate factor}$ | times/year    | 45 |
|              | Auxiliary | TF bus #1                               | $(LF \text{ single tyres B\#} + LF \text{ twin tyres B\#1}) \cdot \text{axle factor bus \#1} \cdot \text{axis requests}$                                                | times/vehicle | 46 |
|              | Constant  | Axle factor bus #1                      | $2 \cdot (0.03)$                                                                                                                                                        | axle/vehicle  | 47 |
|              | Auxiliary | LF single tyres                         | $(wl \text{ single tyres}/7.77)^{4.32}$                                                                                                                                 | dimensionless | 48 |
|              | Auxiliary | LF twin tyres                           | $(wl \text{ twin tyres}/8.17)^{4.32}$                                                                                                                                   | dimensionless | 49 |
|              | Auxiliary | LF double tandem                        | $(wl \text{ double tandem}/15.08)^{4.14}$                                                                                                                               | dimensionless | 50 |
|              | Auxiliary | LF triple tandem                        | $(wl \text{ triple tandem}/22.95)^{4.22}$                                                                                                                               | dimensionless | 51 |
|              | Auxiliary | Wl single tyres B #1                    | $6.6 \cdot (1 + \text{overweight per axle percentage \#1})$                                                                                                             | dimensionless | 52 |
|              | Auxiliary | Parameter $\alpha$                      | $IF \text{ THEN ELSE}(y > 2, (y \cdot (0.6)), (y \cdot (0.3)))$                                                                                                         | dimensionless | 53 |
|              | Auxiliary | Parameter $\beta$                       | $IF \text{ THEN ELSE}(y > 1.5, IF \text{ THEN ELSE}(y < 2, (0.5), (0.1)), 0.8))$                                                                                        | dimensionless | 54 |
|              | Auxiliary | Y                                       | $\text{current life span \#1}/\text{SAVEPER}$                                                                                                                           | dimensionless | 55 |
|              | Flow      | Decrease of PCI                         | $\text{Value of PCI\#1} \cdot (\exp(-\text{Parameter } \alpha \text{ \#1})^{\text{Parameter } \beta \text{ \#1}})/\text{SAVEPER}$                                       | points/year   | 56 |
|              | Stock     | Value of PCI                            | $(\text{decrease in maintenance effect \#1} - \text{decrease of PCI\#1}) dt + S(t_0)$                                                                                   | points        | 57 |
|              | Flow      | Increase in maintenance effect (IME) #1 | $\text{maintenance}/\text{SAVEPER}$                                                                                                                                     | points/year   | 58 |
|              | Stock     | Maintenance effect #1                   | $(\text{increase in maintenance effect \#1} - \text{decrease in maintenance effect\#1})dt + S(t_0)$                                                                     | points        | 59 |
|              | Flow      | Decrease in maintenance effect #1       | $\text{DELAY FIXED}(\text{IME \#1}, 2, \text{IME \#1})$                                                                                                                 | points/year   | 60 |
| Social Costs | Stock     | Cumulative pavement maintenance cost    | $(\text{Yearly pavement maintenance cost})dt + S(t_0)$                                                                                                                  | R\$           | 61 |
|              | Flow      | Yearly pavement maintenance cost        | $\sum_{i=1}^3 (\text{Pavement maintenance cost \#i})$                                                                                                                   | R\$/year      | 62 |
|              | Auxiliary | Corrective maintenance (CM) cost        | $\text{CM cost}/\text{Km} \cdot \text{distance route} \cdot \text{cost growth rate}$                                                                                    | R\$/year      | 63 |
|              | Auxiliary | Restorative maintenance (RM) cost       | $\text{RM cost}/\text{Km} \cdot \text{distance route} \cdot \text{cost growth rate}$                                                                                    | R\$/year      | 64 |
|              | Stock     | Cumulative traffic accident cost        | $(\text{Yearly traffic accident cost})dt + S(t_0)$                                                                                                                      | R\$           | 65 |

**Table 1.** Equations of the SD model (conclusion).

|                             |           |                                     |                                                                                                                                                                  |               |    |
|-----------------------------|-----------|-------------------------------------|------------------------------------------------------------------------------------------------------------------------------------------------------------------|---------------|----|
|                             | Flow      | Yearly traffic accident cost        | $\sum_{i=1}^3 (\text{Traffic accident cost \#}i)$                                                                                                                | R\$/year      | 66 |
|                             | Auxiliary | Traffic accident cost #1            | $\text{accident forecast \#1} \cdot$ $\left( \sum_{i=1}^3 (\text{accident type } i \cdot \text{cost of accident type } i) \cdot \text{cost growth rate} \right)$ | R\$/year      | 67 |
|                             | Auxiliary | Accident forecast #1                | $\text{vehicle with orn. stones} \cdot \text{distance route} \cdot 10^{-6} \cdot \exp^{-0.312}$ $\cdot (\text{correction factor for accident prediction})$       | accident/year | 68 |
| Policies<br>Evaluation<br>n | Stock     | Cumulative transportation cost      | $(\text{Yearly transportation cost})dt + S(t_0)$                                                                                                                 | R\$           | 69 |
|                             | Flow      | Yearly transportation cost          | $\sum_{i=1}^2 (\text{freight volume of \#}i \cdot \text{generalized cost of route \#}i)$                                                                         | R\$/year      | 70 |
|                             | Auxiliary | Weighed cumulative operational cost | $\text{cumulative transportation cost} \cdot \text{Weight of operational cost}$                                                                                  | R\$           | 71 |
|                             | Auxiliary | Weighed cumulative social cost      | $(\text{cumulative pavement maintenance cost}$ $+ \text{cumulative traffic accident cost}) \cdot \text{weight of social cost}$                                   | R\$           | 72 |
|                             | Auxiliary | Weight of operational cost          | $1 - \text{weight of social cost}$                                                                                                                               | dimensionless | 73 |
|                             | Auxiliary | Cumulative total cost               | $\text{Weighed cumulative operational cost} + \text{Weighed cumulative social cost}$                                                                             | R\$           | 74 |
